# Supplementary material for: Cobalt phosphide (Co2P) encapsulated in nitrogen-rich hollow carbon nanocages with fast rate potassium ion storage
Source: Royal Society of Chemistry journal article supplement (doi:10.1039/d0cc07123d), 2020-01-01
Supplement: d0cc07123d1.pdf [file d0cc07123d1.pdf]

## Supporting Information

### Cobalt Phosphide (Co<sub>2</sub>P) Encapsulated in Nitrogen-rich Hollow Carbon Nanocages with Fast Rate Potassium Ion Storage

#### Characterization Techniques

Morphology, structure and composition of electrode materials were investigated using transmission electron microscopy (TEM, FEI TECNAI G2 TF20ST), high-resolution TEM (HRTEM), electron energy loss spectroscopy (EELS), X-ray Diffraction (XRD, PANalytical Empyrean X-ray Diffractometer) and Raman spectroscopy (WITec, Nd:YAG laser with  $\lambda = 532$  nm). The chemical states of different ionic species within the samples were further analyzed using X-ray photo-electron spectroscopy (XPS, AXIS ULTRA) technique.

Electrochemical tests were carried out using CR-2032 coin cells. The working electrodes were prepared by casting the slurry of active material (Co<sub>2</sub>P@NCC), carbon black and polyvinylidene difluoride binder (8:1:1 in weight ratio) on a copper foil and drying out the solvent in vacuum oven at 80 °C. The mass loading of the active material was about 1 mg cm<sup>-2</sup>. An electrolyte of 0.8 M KPF<sub>6</sub> in ethylene carbonate (EC) / diethyl carbonate (DEC) / propylene carbonate (PC) (2:1:2 vol/vol/vol) without any additives was used, along with a potassium metal foil as a counter electrode. The galvanostatic charge-discharge tests were tested on Abrin battery cycler. The CV curves were recorded on a Princeton electrochemical workstation. All tests were conducted at room temperature.

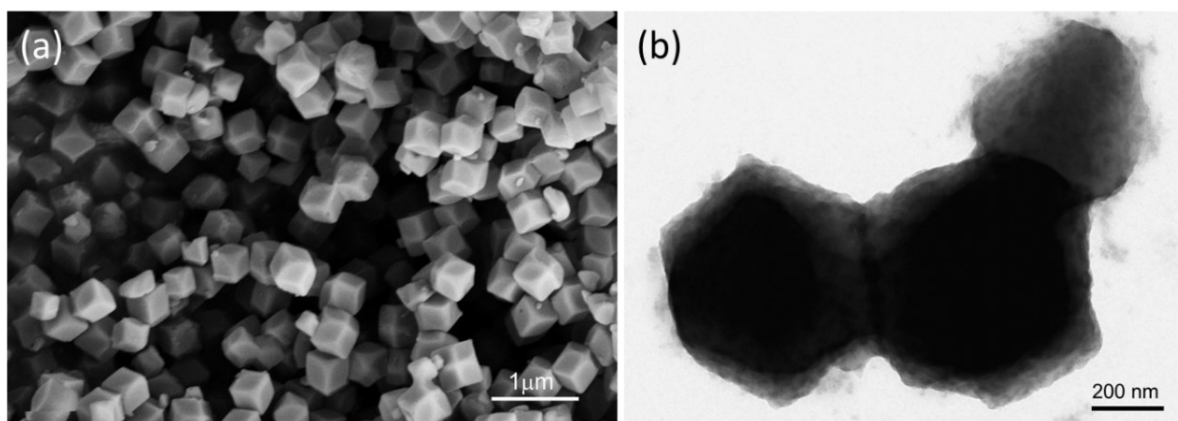

**Fig. S1** Morphological characterization of as-synthesized ZIF-67 precursors. (a) shows the Field Emission Scanning Electron Microscope (FESEM) image and (b) shows corresponding TEM image of rhombic dodecahedral shaped microstructures.

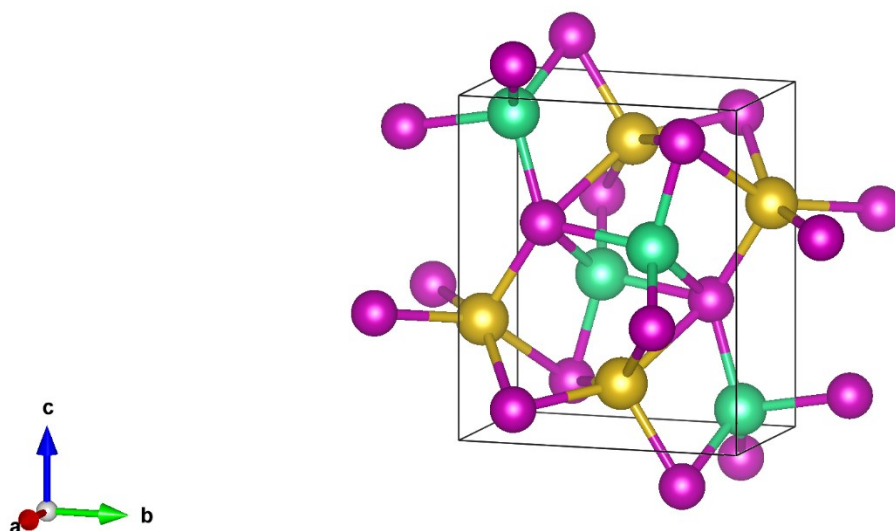

**Fig. S2** A ball-stick model of the primitive unit cell of orthorhombic  $\text{Co}_2\text{P}$  which contains edge-sharing  $\text{CoP}_4$  tetrahedra and  $\text{CoP}_5$  pentahedra, resulting in nine-coordinate P atoms.<sup>1</sup> In the Figure, tetra- and penta- co-ordinated Co atoms are labelled with different colors. (Gold Co atoms  $\rightarrow$   $\text{CoP}_5$ , Green Co atoms  $\rightarrow$   $\text{CoP}_4$ ), whereas Pink atoms represent P.

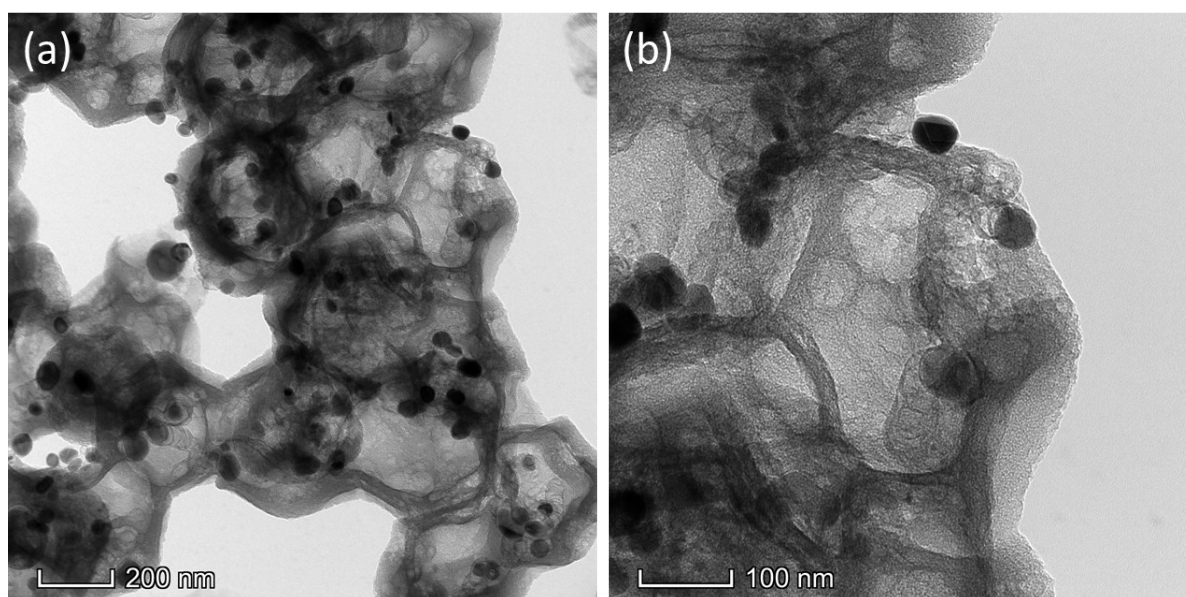

**Fig. S3** (a) and (b) TEM images of the  $\text{Co}_2\text{P}@NCC$  nanocomposite. The dark and spheroidal-shaped  $\text{Co}_2\text{P}$  nanoparticles are encapsulated inside the hollow carbon nanocages, forming a 'rattle-like' structure.

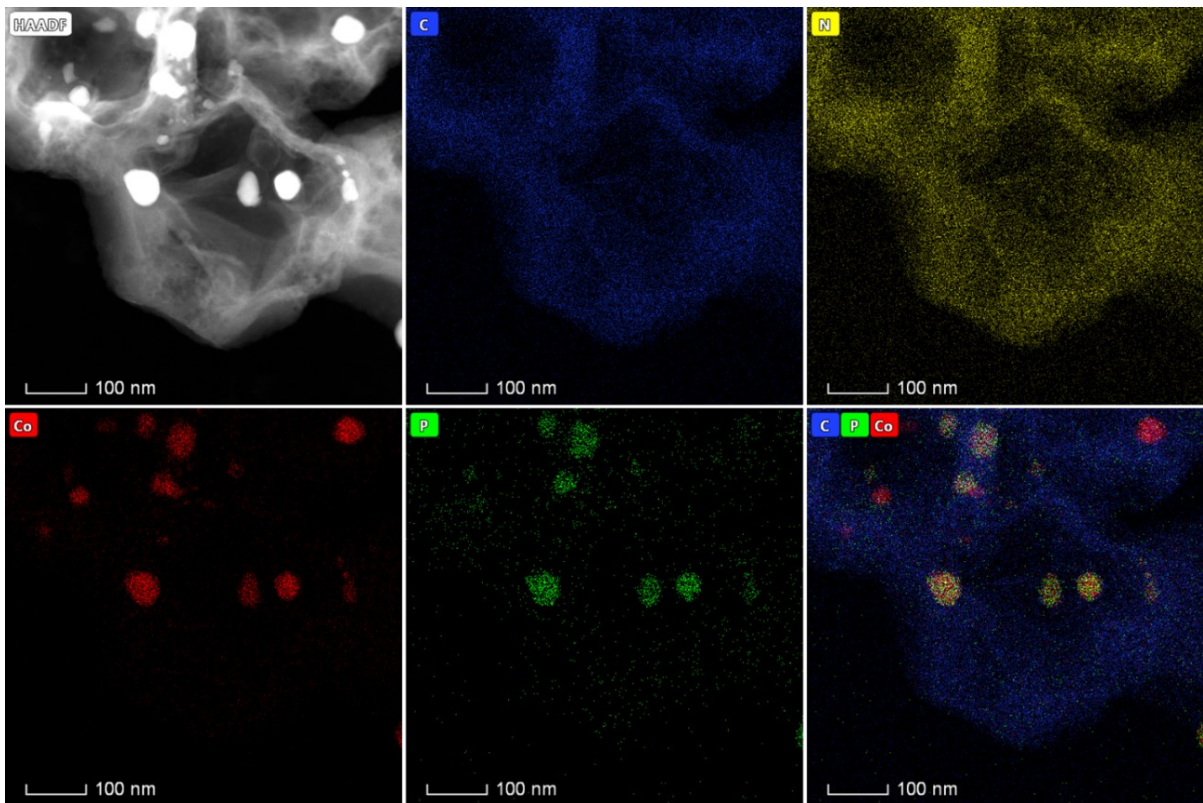

**Fig. S4** EELS color mapping of various constituent elements like, C, N, Co, and P of the Co<sub>2</sub>P/NCC nanocomposites. The study confirms uniform doping of N throughout the whole NCC matrix and presence of Co and P in constituting the Co<sub>2</sub>P nanoparticles. One-to-one correspondence between Co and P elemental maps suggests absence of any metallic Co.

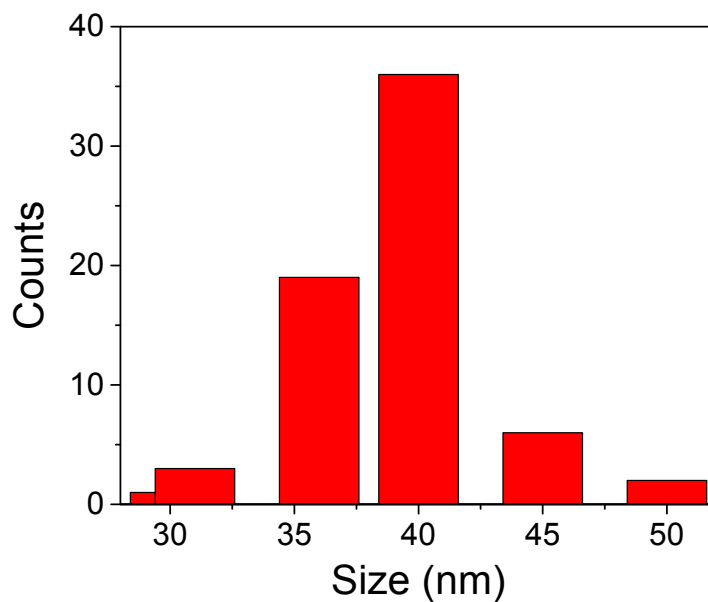

**Fig. S5** Particle size distribution of Co<sub>2</sub>P nanoparticles in NCC matrix.

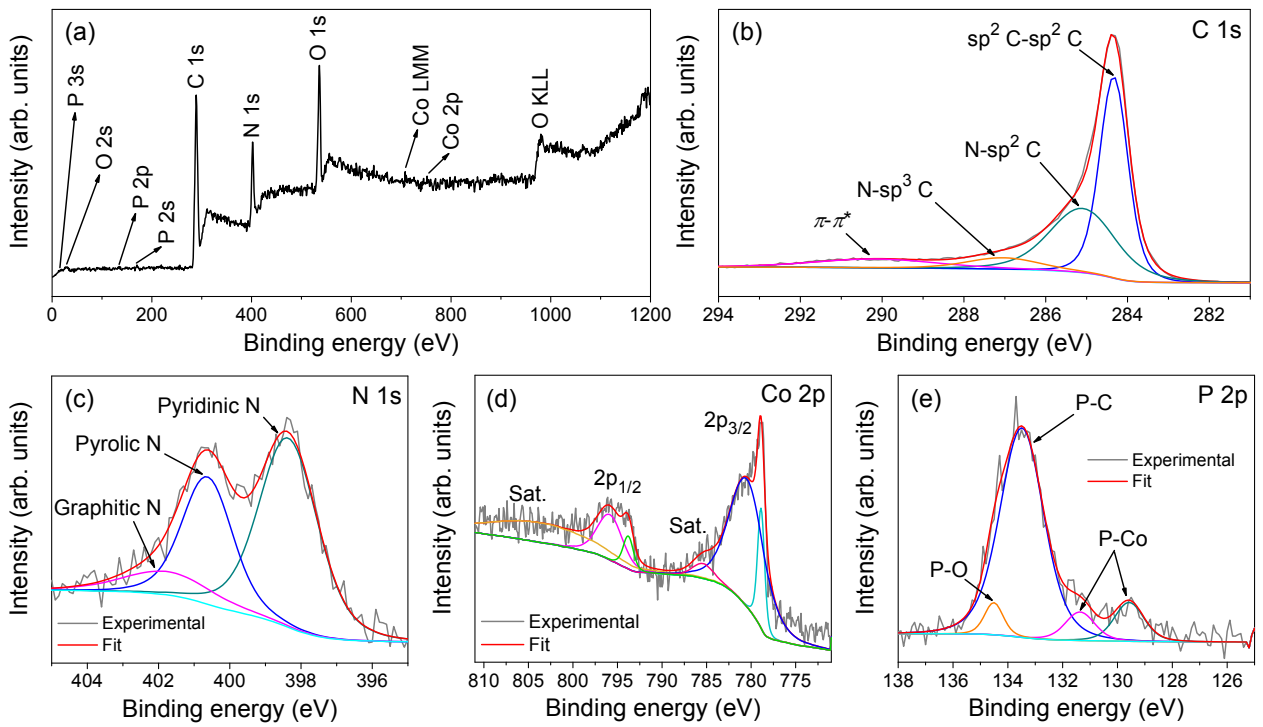

**Fig. S6** Core-level XPS spectra of  $\text{Co}_2\text{P@NCC}$ . (a) Low resolution survey spectrum. (b) - (e) High resolution XPS spectra of C 1s, N 1s, Co 2p, and P 2p, respectively.

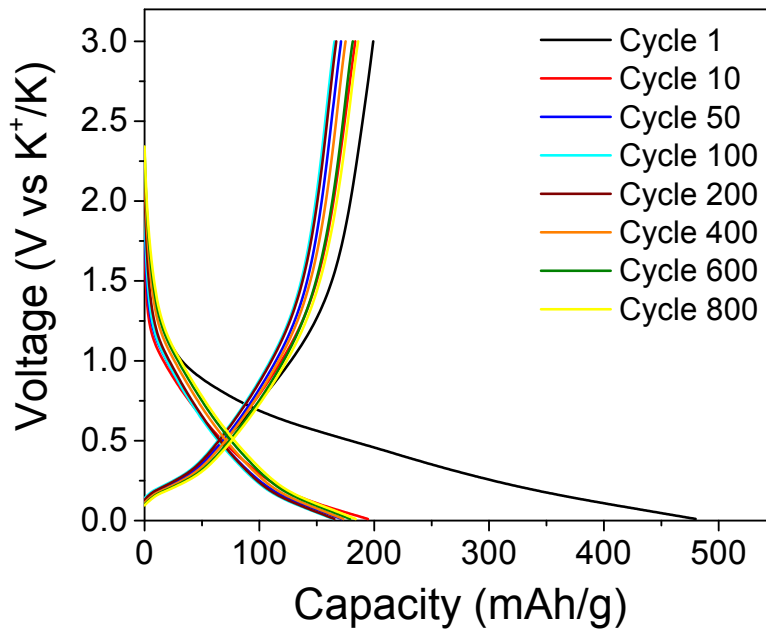

**Fig. S7** Representative charge-discharge profiles recorded during the assessment of cycling performance of the  $\text{Co}_2\text{P@NCC}$  anode at a current density of 100 mA/g.

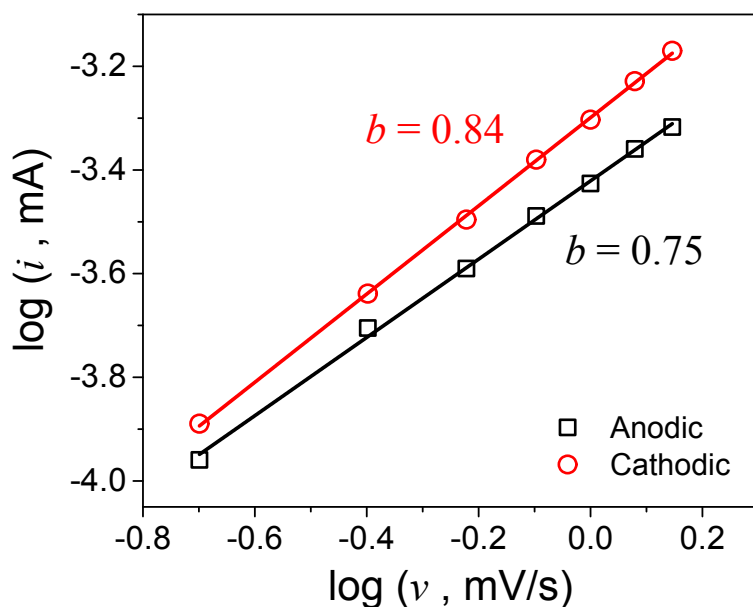

**Fig. S8** Determination of  $b$ -values for selected cathodic and anodic processes during CV measurements.

**Table S1** A comparison of rate capability of  $\text{Co}_2\text{P}/\text{NCC}$  nanocomposite versus state-of-the-art cobalt-based, phosphide-based, and carbon-based anodes from recently published literature, tested vs.  $\text{K}/\text{K}^+$ .

| Sl. No. | Material                                          | Voltage window | 1st reversible discharge capacity (1st CE) | Rate performance                                                    | Ref. # Publish year |
|---------|---------------------------------------------------|----------------|--------------------------------------------|---------------------------------------------------------------------|---------------------|
| 1.      | $\text{Co}_2\text{P}/\text{NCC}$                  | 0.01-3 V       | 270 mA/g @ 50 mA/g (42.1%)                 | 196 mAh/g @ 100 mA/g<br>137 mAh/g @ 500 mA/g<br>91 mAh/g @ 2 A/g    | This work           |
| 2.      | N, P-Codoped Porous Carbon Sheets/CoP Hybrids     | 0.01-3 V       | 174 mAh/g @ 50 mA/g (19.6%)                | 134 mAh/g @ 100 mA/g<br>94 mAh/g @ 500 mA/g<br>54 mAh/g @ 2 A/g     | 2<br>2018           |
| 3.      | C- $\text{Co}_2\text{P}@r\text{GO}$               | 0.01-3 V       | 143 mAh/g @ 20 mA/g (~35%)                 | ~100 mAh/g @ 100 mA/g<br>~75mAh/g @ 500 mA/g<br>50 mAh/g @ 2 A/g    | 3<br>2019           |
| 4.      | ZIF-8@ZIF-67-Derived Nitrogen-Doped Porous Carbon | 0.01-2.5 V     | ~200 mAh/g @ 50 mA                         | 150 mAh/g @ 500 mA/g<br>~175 mAh/g @ 100 mA/g<br>~115 mAh/g @ 2 A/g | 4<br>2020           |
| 5.      | Oxidizing-acid treated melamine foam              | 0.01-3 V       | ~200 mAh/g @ 50 mA/g (26.7%)               | 170 mAh/g @ 100 mA/g<br>110 mAh/g @ 500 mA/g<br>80 mAh/g @ 1 A/g    | 5<br>2019           |

|     |                                               |            |                             |                                                                      |                                    |
|-----|-----------------------------------------------|------------|-----------------------------|----------------------------------------------------------------------|------------------------------------|
|     | carbons (OMFCs)-60                            |            |                             |                                                                      |                                    |
| 6.  | CoSe-S@Carbon                                 | 0.01-3 V   | ~225 mAh/g @ 100 mA/g       | ~225 mAh/g @ 100 mA/g<br>3.3 mAh/g @ 2 A/g                           | <sup>6</sup><br>2020               |
| 7.  | Pristine Co <sub>0.85</sub> Se hollow cubes   | 0.01-2.5V  | 233 mAh/g @ 50 mA/g         | 173 mAh/g @ 100 mA/g<br>138 mAh/g @ 500 mA/g<br>110 mAh/g @ 1 A/g    | <sup>7</sup><br>2020               |
| 8.  | Co@graphitic nanotubes                        | 0.01-3 V   | 200 mAh/g @ 50 mA/g         | 121 mAh/g @ 100 mA/g<br>49 mAh/g @ 500 mA/g<br>21 mAh/g @ 1 A/g      | <sup>8</sup><br>2020               |
| 9.  | Cobalt terephthalate (CoTP)/Super P composite | 0.1-2 V    | 216 mAh/g @ 60 mA/g         | 100 mAh/g @ 120 mA/g<br>27 mAh/g @ 480 mA/g                          | <sup>9</sup><br>2017               |
| 10. | Co <sub>0.85</sub> Se-QDs/C-2                 | 0.01-2.5 V | ~180 mAh/g @ 50 mA/g        | ~110 mAh/g @ 100 mA/g<br>~75 mAh/g @ 500 mA/g                        | <sup>10</sup><br>2019              |
| 11. | FeP@C nanoboxes                               | 0.01-2.5 V | 201 mAh/g @ 100 mA/g (47%)  | 101 mAh/g @ 500 mA/g<br>65 mAh/g @ 1 A/g<br>37 mAh/g @ 2 A/g         | <sup>11</sup><br>2019              |
| 12. | FeP nanocubes                                 | 0.01-2.5 V | 160 mAh/g @ 100 mA/g        | 75 mAh/g @ 500 mA/g<br>50 mAh/g @ 1 A/g<br>35 mAh/g @ 2 A/g          | <sup>11</sup><br>2019              |
| 13. | FeP/C composite                               | 0.01-3 V   | 218 mAh/g @ 50 mA/g (45.1%) | 186 mAh/g @ 100 mA/g<br>113 mAh/g @ 500 mA/g<br>79 mAh/g @ 1 A/g     | <sup>12, 13</sup><br>2020,<br>2019 |
| 14. | N-CNF@FeP                                     | 0.01-3 V   | 222 mAh/g @ 50 mA/g (57%)   | 195 mAh/g @ 100 mA/g<br>140 mAh/g @ 400 mA/g<br>103 mAh/g @ 800 mA/g | <sup>14</sup><br>2020              |
| 15. | Bimetallic Fe-Ni phosphide                    | 0.01-2.5 V | 168 mAh/g @ 50mA/g          | 107 mAh/g @ 100 mA/g<br>64 mAh/g @ 500 mA/g<br>46 mAh/g @ 2 A/g      | <sup>15</sup><br>2020              |
| 16. | Sn <sub>4</sub> P <sub>3</sub> @Carbon Fiber  | 0.01-2 V   | ~200 mAh/g @ 50 mA/g        | 90 mAh/g @ 100 mA/g<br>~0 mAh/g at higher current densities          | <sup>16</sup><br>2018              |
| 17. | SnP <sub>0.94</sub> @GO                       | 0.01-2 V   | 190 mAh/g @ 50 mA/g (42%)   | 146 mAh/g @ 100 mA/g<br>118 mAh/g @ 500 mA/g<br>84 mAh/g @ 1 A/g     | <sup>17</sup><br>2019              |

## References

- 1 J. F. Callejas, C. G. Read, E. J. Popczun, J. M. McEnaney and R. E. Schaak, *Chem. Mater.*, 2015, **27**, 3769-3774.
- 2 J. Bai, B. Xi, H. Mao, Y. Lin, X. Ma, J. Feng and S. Xiong, *Adv. Mater.*, 2018, **30**, 1802310.
- 3 Y. Wang, Z. Zhang, G. Wang, X. Yang, Y. Sui, F. Du and B. Zou, *Nanoscale Horiz.*, 2019, **4**, 1394-1401.

- 4 Y. Yi, W. Zhao, Z. Zeng, C. Wei, C. Lu, Y. Shao, W. Guo, S. Dou and J. Sun, *Small*, 2020, **16**, 1906566.
- 5 R. Zhang, H. Li, R. Li, D. Wei, W. Kang, Z. Ju and S. Xiong, *Chem. Commun.*, 2019, **55**, 14147-14150.
- 6 C. Wang, B. Zhang, H. Xia, L. Cao, B. Luo, X. Fan, J. Zhang and X. Ou, *Small*, 2020, **16**, 1905853.
- 7 D. Li, J. Zhang, G. Suo, Q. Yu, W. Wang, L. Feng, X. Hou, X. Ye, L. Zhang and Y. Yang, *J. Electroanal. Chem.*, 2020, **864**, 114100.
- 8 M. Rashad, M. Asif, J. H. Shah, J. Li and I. Ahmed, *Ceram. Int.*, 2020, **46**, 8862-8868.
- 9 C. Fan, M. Zhao, C. Li, C. Wang, B. Cao, X. Chen, Y. Li and J. Li, *Electrochim. Acta*, 2017, **253**, 333-338.
- 10 Z. Liu, K. Han, P. Li, W. Wang, D. He, Q. Tan, L. Wang, Y. Li, M. Qin and X. Qu, *Nano-Micro Lett.*, 2019, **11**, 96.
- 11 F. Yang, H. Gao, J. Hao, S. Zhang, P. Li, Y. Liu, J. Chen and Z. Guo, *Adv. Funct. Mater.*, 2019, **29**, 1808291.
- 12 H. Fan, W. Li, H. Wei, S. An, X. Qiu and G. Jia, *J. Phys. Chem. C*, 2020, **124**, 6495-6501.
- 13 W. Li, B. Yan, H. Fan, C. Zhang, H. Xu, X. Cheng, Z. Li, G. Jia, S. An and X. Qiu, *ACS Appl. Mater. Interfaces*, 2019, **11**, 22364-22370.
- 14 X. Wang, J. Ma, J. Wang and X. Li, *J. Alloys Compd.*, 2020, **821**, 153268.
- 15 Y. Wu, Y. Yi, Z. Sun, H. Sun, T. Guo, M. Zhang, L. Cui, K. Jiang, Y. Peng and J. Sun, *Chem. Eng. J.*, 2020, **390**, 124515.
- 16 W. Zhang, W. K. Pang, V. Sencadas and Z. Guo, *Joule*, 2018, **2**, 1534-1547.
- 17 X. Zhao, W. Wang, Z. Hou, G. Wei, Y. Yu, J. Zhang and Z. Quan, *Chem. Eng. J.*, 2019, **370**, 677-683.
